# Supplementary material
Source: Research Square preprint supplement (doi:10.21203/rs.3.rs-8921665/v1)
Supplement: Supplementary file 1 [file 3263b275d19b0c29265d7b30.docx]

Appendix Table 1. Agroecological zone level median and interannual variability (CV) in ROD, RCD and GSL in the baseline and future period (2035) under SSP2-4.5 and SSP5-8.5 scenario in maize-based areas of Ethiopia and Rwanda

| Events | Country | AEZ | Baseline | | SSP2-4.5 | | SSP5-8.5 | |
| --- | --- | --- | --- | --- | --- | --- | --- | --- |
| Median±SD | CV [%] | Median±SD | CV [%] | Median±SD | CV [%] |
| ROD [DoY] | Ethiopia | WSHL | 110±16 | 14 | 135±23 | 16 | 135±24 | 17 |
| MSHL | 119±12 | 11 | 133±10 | 8 | 139±14 | 10 |
| THMH | 74±17 | 22 | 123±11 | 9 | 120±13 | 11 |
| SAL | 84±23 | 29 | 121±19 | 16 | 117±20 | 17 |
| MH | 95±18 | 19 | 125±16 | 13 | 122±20 | 16 |
| SAMH | 104±27 | 24 | 114±27 | 22 | 116±32 | 25 |
| Rwanda | CSH | 47±14 | 28 | 60±14 | 24 | 54±15 | 27 |
| CH | 31±5 | 15 | 41±9 | 19 | 41±12 | 25 |
| RCD [DoY] | Ethiopia | WSML | 294±14 | 5 | 209±42 | 19 | 200±54 | 24 |
| MSHL | 311±14 | 5 | 304±24 | 8 | 301±43 | 15 |
| THMH | 309±21 | 7 | 303±54 | 19 | 310±56 | 20 |
| SAL | 289±46 | 17 | 293±63 | 24 | 276±67 | 27 |
| MH | 294±36 | 13 | 285±47 | 18 | 279±63 | 25 |
| SAMH | 267±53 | 22 | 188±59 | 28 | 199±63 | 30 |
| Rwanda | CSH | 165±9 | 5 | 158±27 | 19 | 153±23 | 15 |
| CH | 181±10 | 5 | 175±28 | 17 | 171±8 | 5 |
| GSL [Days] | Ethiopia | WSML | 147±21 | 14 | 80±13 | 15 | 86±17 | 20 |
| MSHL | 178±12 | 7 | 162±25 | 16 | 155±35 | 23 |
| THMH | 208±21 | 10 | 174±48 | 31 | 174±43 | 27 |
| SAL | 197±45 | 25 | 131±52 | 37 | 127±52 | 39 |
| MH | 170±25 | 15 | 134±38 | 30 | 126±38 | 32 |
| SAMH | 122±32 | 25 | 79±36 | 38 | 78±32 | 33 |
| Rwanda | CSH | 122±18 | 14 | 96±28 | 31 | 100±27 | 29 |
| CH | 154±10 | 7 | 128±29 | 24 | 126±14 | 11 |
